# Supplementary material for: A Pathway-Based Genomic Approach to Identify Medications: Application to Alcohol Use Disorder
Source: MDPI journal article supplement (doi:10.3390/brainsci9120381), 2019-12-16
Supplement: s1 [file s1]

# Cell Type Enrichment

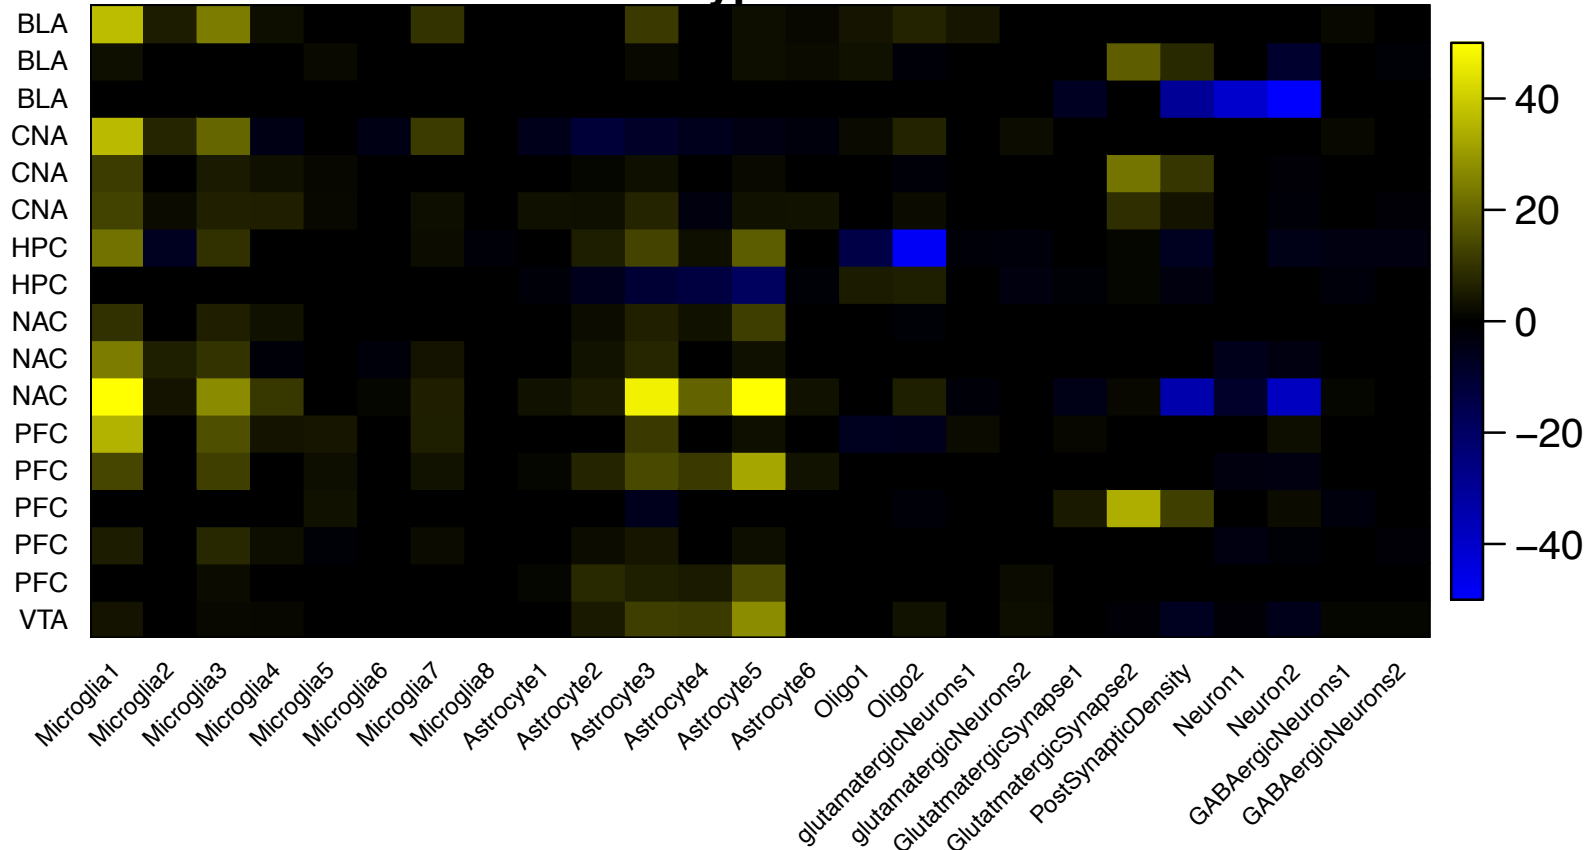

**Figure S1.** Heatmap displaying the  $\log_{10}$ p-value associated with the enrichment of cell type specific datasets within the genesets up-regulated (yellow) or down-regulated (blue) in human alcoholic brain tissue. The brain area for the human gene expression study is shown (BLA: basolateral amygdala, CNA: central nucleus of the amygdala, HPC: hippocampus, NAC: nucleus accumbens, PFC: prefrontal cortex, VTA: ventral tegmental area). Table S2 includes all p values and the full names of the cell type datasets. See Methods for details. More information on cell type datasets can be found here:

<https://www.rdocumentation.org/packages/WGCNA/versions/1.25-1/topics/userListEnrichment/>.
